# Supplementary material for: Extracellular Enzymes and Bioactive Compounds from Antarctic Terrestrial Fungi for Bioprospecting
Source: Int J Environ Res Public Health. 2020 Sep 4;17(18):6459. doi: 10.3390/ijerph17186459 (PMC7558612; doi:10.3390/ijerph17186459)
Supplement: Supplementary file 1 [file ijerph-17-06459-s001.xlsx]

## Sheet: Foglio2
				Aspergillus ochraceopetaliformis	A. sydowii	Candida sake	Cladosporium cladosporioides	Debaryomyces hansenii	Geomyces sp.	Mortierella alpina	Oidiodendron truncatum	Papiliotrema laurentii (sub. Cryptococcus laurentii)	Penicillium allii-sativi	P. aurantiogriseum ( sub. P. lanosocoeruleum)	P. brevicompactum	P. chrysogenum	P. chrysogenum var. dipodomyus (sub. P. dipodomyus)	P. coprobium	P. desertorum	P. flavigenum	P. glandicola (sub. P. confertum and P. mononematosum)	P. goetzii	P. griseofulvum	P. halotolerans	P. kewense	P. nalgiovense	P. nilense (sub. P. egyptiacum)	P. persicinum	P. rubens	P. sinaicum	P. tardochrysogenum	P. vanluykii	P. cf. kewense	Penicillium sp.	Rhodotorula glutinis	Talaromyces islandicus (sub. Penicillium islandicum)
acidic organic polymers	acidic organic polymers	acidic organic polymers	Fulvic acid																				[53]
Aflavinine	Aflavinine	Aflavinine	Dehydroaflavinine																			[57]			[57]					[57]			[57]
alkaloid	alkaloid	alkaloid	Chanoclavine I																				[53]
	alkaloid	alkaloid	Neoxaline															[53]																[65]
	alkaloid	alkaloid	Elymoclavine																				[53]
	alkaloids	alkaloids	Chrysogenamide										[57]																[57]
	alkaloids	alkaloids	Meleagrin										[57]					[53]																[65]
	alkaloids	alkaloids	Pyrrolopyrazine alkaloids							[64]
	alkanoids	alkanoids	Indolalkaloids																											[57]
Alkene	Alkene	Alkene	1-undecene															[53]
amino acid	amino acid	amino acid	Threonine
	amino acid	amino acid	Tyrosine					[67]																											[67]
	amino acid	amino acid	Valine					[67]
	amino acids	amino acids	Alanine					[67]				[67]
	amino acids	amino acids	Cyclo-(L-Trp-L-Phe)		[63]
	amino acids	amino acids	Leucine					[67]
antibiotic	antibiotic	tetracycline-like antibiotic	Viridicatumtoxin											[57]
	antibiotic	antibiotic	Mycelianamide																				[53]
	antibiotics		Penicillic acid																								[57]
	antibiotics		Penicillins										[10, 57]			[57]				[57]									[57]		[57]	[57]		[65]
aromatic compoud	aromatic compoud	Polyphenylether	Polyphenylether
	aromatic compoud	anthraquinones	Roseoskyrin																																	[53]
	aromatic compoud	bis‐anthraquinone	Rubroskyrin																																	[53]
	aromatic compoud	tetrahydroxanthones	Secalonic acids													[57]					[57]						[57]				[57]
	aromatic compoud	aromatic hydrocarbon	Styrene															[53]
	aromatic compoud	naphtho-α-pyrone	Viriditoxin																		[57]
	aromatic compounds	aromatic compounds	Cyclopaldic acid & derived chromanols																		[57]
	aromatic compounds	aromatic compounds	Cyclopiamin															[53]
	aromatic compounds	anthraquinone	Emodin																																	[53]
	aromatic compounds	anthraquinone	Endocrocin																																	[53]
	aromatic compounds	aromatic compounds	Ethyl asterrate						[64]
	aromatic compounds	anthraquinone	Flavoskyrin																																	[53]
	aromatic compounds	anthraquinone	Islandicin																																	[53]
	aromatic compounds	aromatic compounds	N-(2-hydroxyphenyl)-acetamide																															[65]
	aromatic compounds	anthraquinones	Nalgiovensin																							[57]
	aromatic organic compound	benzoxazoles	2-benzoxazolinone																															[65]
	aromatic organic compound	benzamides	2-pyruvoylaminobenzamide										[57]			[57]										[57]		[57]	[57]
	aromatic organic compound	benzaldehyde	4-dihydroxy-3,5,6-trimethylbenzaldehyde		[10]
	aromatic organic compound	phenylacetic acid	4-hydroxyphenylacetic acid		[63]
	aromatic organic compound	naphtho-γ-pyrone	a naphtho-γ-pyrone										[57]
	aromatic organic compound	anthraquinone	Chrysophanol																																	[53]
	carboxylic acids	carboxylic acids	Formic acid					[67]																											[67]
	chlorinated polyketides	chlorinated polyketides	Chloctanspirone A																										[10]
cladosporin	cladosporin	cladosporin	Isocladosporin				[53]
cyclic carboxylic esters	cyclic carboxylic esters	lactone	Asperentins																												[57]
cyclic carboxylic esters	cyclic carboxylic esters	lactone	Citreoisocoumarin													[57]					[57]	[57]				[57]			[57]
	cyclic carboxylic esters	γ-lactone	Tetronic acids																								[57]
cyclic ketone	cyclic ketone	cyclic ketone	Isoepoxydon											[57]								[57]			[57]					[57]			[57]
cyclic polypeptide	cyclic polypeptide	cyclic polypeptide	Simatoxin																																	[53]
Exopolysaccharides	Exopolysaccharides	Exopolysaccharides	Exopolysaccharides					[67]				[14]																							[67]
Fatty acids	Fatty acids	Fatty acids	Hexanedioic acid dioctyl ester
furofurans	furofurans	asteltoxin	Isoasteltoxin	[56]
	furofurans	furofurans	Asteltoxin, Asteltoxin B	[24]																	[57]
heterocyclic compound	heterocyclic compound	2-benzofurans	Mycophenolic acid (MPA)												[10]
	heterocyclic compound	diketopiperazine	Penilloid A																															[65]
	heterocyclic compound	heteropentacyclic compound	Fumitremorgin A, B, C, TR-2 & verruculogen																		[57]	[57]			[57]
	heterocyclic compound	xanthon	Hydrogenated xanthon		[10]
	heterocyclic compound	heterocyclic compound	Questiomycin A																															[65]
	heterocyclic compounds	indolyl diketopiperazine	(E)-3-(1H-imidazole-4-yimethylene)-6-(1H-indl-3-ylmethyl)-2,5-piperazinediol																															[65]
	heterocyclic compounds	piperazine	Chetracin B, C, D								[62]
	heterocyclic compounds	2,5-diketopiperazines	Roquefortines										[57]			[57]		[53]		[57]	[57]		[53]	[57]	[57]			[57]	[57]			[57]
	heterocyclic marine natural product	Acremolin	Acremolin C		[63]
indole terpenoid	indole terpenoid	indole-diterpenoid	Penitrem A																	[57]
meroterpenoid	merosesquiterpenoids	merosesquiterpenoids	Ochraceopones A−E	[56]
	meroterpenoid	meroterpenoid	Andrastins													[57]					[57]	[57]		[57]	[57]			[57]	[57]			[57]	[57]
	meroterpenoid	meroterpenoid	7-deacetoxyyanuthone																										[57]
	meroterpenoid	meroterpenoid	Atlantinone A										[57]
mycotoxin	mycotoxin	Isochromantoxins	Isochromantoxins																		[57]
nitrogenous bases	nitrogenous bases	nitrogenous bases	Adenine					[67]																											[67]
oxime-containing	oxime-containing	Acetaldoxime	2-(4-hydroxyphenyl)-2-oxo acetaldehyde oxim										[57]						[57]
phenols	phenols	phenols	Raistrick phenols																[57]					[57]			[57]
Polyene	Polyene	Polyene	Amphotericin B																							[54]
polyketide	polyketide	polyketide	Patulin															[53]
	polyketide	pyrone-type polyketide	Verrucosidin										[57]
	Polyketide compounds	Polyketide compounds	Sorbicillins													[57]				[57]									[57]
Saturated fatty acid	Saturated fatty acid	Saturated fatty acid	2-amino-9,13-dimethyl heptadecanoic acid
sesquiterpenoid	sesquiterpenoid	sesquiterpenoid	Pyripyropens															[53]
	sesquiterpenoids	sesquiterpenoids	(7S)-(+)-hydroxysydonic acid		[63]
	sesquiterpenoids	sesquiterpenoids	(7S, 11S)-(+)-12-hydroxysydonic acid		[63]
spirocyclic	spirocyclic	spirocyclic	Pseurotin A																											[57]
toxin	toxin		Tryptoquialanins											[57]
	Toxin	Toxin	Hepatotoxins																																	[53]
Volatile Organic Compounds	Volatile Organic Compounds	Volatile Organic Compounds	VOCs			[79]
		Macrophorin	4’-oxomacrophorin A, D
		Acetic acid	Acetic acid					[67]
		calphostins	Calphostins				[53]
		Chrysogine	Chrysogine													[57]										[57]		[57]				[57]
			Diaporthins																							[57]
			Dipodazin																							[57]
			Geomycin A, B, C						[64]
		Griseofulvin (antifungal agent)	Griseofulvin											[57]									[53]					[57]
			Hetero-spirocyclic γ-lactams		[10]
			Iridiskyrin																																	[53]
			Isopenilline A																															[65]
			Met Ø																												[57]
			Oidioperazine A, B, C, D								[62]
			Skyrin																																	[53]
			Xanthocillins													[57]											[57]		[57]

## Sheet: Foglio3
			Aspergillus ochraceopetaliformis	A. sydowii	Candida sake	Cladosporium cladosporioides	Debaryomyces hansenii	Geomyces sp.	Mortierella alpina	Oidiodendron truncatum	Papiliotrema laurentii (sub. Cryptococcus laurentii)	Penicillium allii-sativi	P. aurantiogriseum ( sub. P. lanosocoeruleum)	P. brevicompactum	P. chrysogenum	P. chrysogenum var. dipodomyus (sub. P. dipodomyus)	P. coprobium	P. desertorum	P. flavigenum	P. glandicola (sub. P. confertum and P. mononematosum)	P. goetzii	P. griseofulvum	P. halotolerans	P. kewense	P. nalgiovense	P. nilense (sub. P. egyptiacum)	P. persicinum	P. rubens	P. sinaicum	P. tardochrysogenum	P. vanluykii	P. cf. kewense	Penicillium sp.	Rhodotorula glutinis	Talaromyces islandicus (sub. Penicillium islandicum)
acidic organic polymers	acidic organic polymers	Fulvic acid																				[53]
Aflavinine	Aflavinine	Dehydroaflavinine																			[57]			[57]					[57]			[57]
alkaloid	alkaloid	Chanoclavine I																				[53]
	alkaloid	Neoxaline															[53]																[65]
	alkaloid	Elymoclavine																				[53]
	alkaloids	Chrysogenamide										[57]																[57]
	alkaloids	Meleagrin										[57]					[53]																[65]
	alkaloids	Pyrrolopyrazine alkaloids							[64]
	alkanoids	Indolalkaloids																											[57]
amino acid	amino acid	Threonine
	amino acid	Tyrosine					[67]																											[67]
	amino acid	Valine					[67]
	amino acids	Alanine					[67]				[67]
	amino acids	Cyclo-(L-Trp-L-Phe)		[63]
	amino acids	Leucine					[67]
antibiotic	tetracycline-like antibiotic	Viridicatumtoxin											[57]
	antibiotic	Mycelianamide																				[53]
		Penicillic acid																								[57]
		Penicillins										[10, 57]			[57]				[57]									[57]		[57]	[57]		[65]
aromatic compoud	Polyphenylether	Polyphenylether
	anthraquinones	Roseoskyrin																																	[53]
	bis‐anthraquinone	Rubroskyrin																																	[53]
	tetrahydroxanthones	Secalonic acids													[57]					[57]						[57]				[57]
	aromatic hydrocarbon	Styrene															[53]
	naphtho-α-pyrone	Viriditoxin																		[57]
	aromatic compounds	Cyclopaldic acid & derived chromanols																		[57]
	aromatic compounds	Cyclopiamin															[53]
	anthraquinone	Emodin																																	[53]
	anthraquinone	Endocrocin																																	[53]
	aromatic compounds	Ethyl asterrate						[64]
	anthraquinone	Flavoskyrin																																	[53]
	anthraquinone	Islandicin																																	[53]
	aromatic compounds	N-(2-hydroxyphenyl)-acetamide																															[65]
	anthraquinones	Nalgiovensin																							[57]
	benzoxazoles	2-benzoxazolinone																															[65]
	benzamides	2-pyruvoylaminobenzamide										[57]			[57]										[57]		[57]	[57]
	benzaldehyde	4-dihydroxy-3,5,6-trimethylbenzaldehyde		[10]
	phenylacetic acid	4-hydroxyphenylacetic acid		[63]
	naphtho-γ-pyrone	a naphtho-γ-pyrone										[57]
	anthraquinone	Chrysophanol																																	[53]
	carboxylic acids	Formic acid					[67]																											[67]
	chlorinated polyketides	Chloctanspirone A																										[10]
cladosporin	cladosporin	Isocladosporin				[53]
cyclic carboxylic esters	lactone	Asperentins																												[57]
	lactone	Citreoisocoumarin													[57]					[57]	[57]				[57]			[57]
	γ-lactone	Tetronic acids																								[57]
cyclic ketone	cyclic ketone	Isoepoxydon											[57]								[57]			[57]					[57]			[57]
cyclic polypeptide	cyclic polypeptide	Simatoxin																																	[53]
Exopolysaccharides	Exopolysaccharides	Exopolysaccharides					[67]				[14]																							[67]
Fatty acids	Fatty acids	Hexanedioic acid dioctyl ester
furofurans	asteltoxin	Isoasteltoxin	[56]
	furofurans	Asteltoxin, Asteltoxin B	[24]																	[57]
heterocyclic compound	2-benzofurans	Mycophenolic acid (MPA)												[10]
	diketopiperazine	Penilloid A																															[65]
	heteropentacyclic compound	Fumitremorgin A, B, C, TR-2 & verruculogen																		[57]	[57]			[57]
	xanthon	Hydrogenated xanthon		[10]
	heterocyclic compound	Questiomycin A																															[65]
	indolyl diketopiperazine	(E)-3-(1H-imidazole-4-yimethylene)-6-(1H-indl-3-ylmethyl)-2,5-piperazinediol																															[65]
	piperazine	Chetracin B, C, D								[62]
	2,5-diketopiperazines	Roquefortines										[57]			[57]		[53]		[57]	[57]		[53]	[57]	[57]			[57]	[57]			[57]
	Acremolin	Acremolin C		[63]
indole terpenoid	indole-diterpenoid	Penitrem A																	[57]
merosesquiterpenoids	merosesquiterpenoids	Ochraceopones A−E	[56]
meroterpenoid	meroterpenoid	Andrastins													[57]					[57]	[57]		[57]	[57]			[57]	[57]			[57]	[57]
	meroterpenoid	7-deacetoxyyanuthone																										[57]
	meroterpenoid	Atlantinone A										[57]
mycotoxin	Isochromantoxins	Isochromantoxins																		[57]
nitrogenous bases	nitrogenous bases	Adenine					[67]																											[67]
oxime-containing	Acetaldoxime	2-(4-hydroxyphenyl)-2-oxo acetaldehyde oxim										[57]						[57]
phenols	phenols	Raistrick phenols																[57]					[57]			[57]
Polyene	Alkene	1-undecene															[53]
	Polyene	Amphotericin B																							[54]
polyketide	polyketide	Patulin															[53]
	pyrone-type polyketide	Verrucosidin										[57]
	Polyketide compounds	Sorbicillins													[57]				[57]									[57]
Saturated fatty acid	Saturated fatty acid	2-amino-9,13-dimethyl heptadecanoic acid
sesquiterpenoid	sesquiterpenoid	Pyripyropens															[53]
	sesquiterpenoids	(7S)-(+)-hydroxysydonic acid		[63]
	sesquiterpenoids	(7S, 11S)-(+)-12-hydroxysydonic acid		[63]
spirocyclic	spirocyclic	Pseurotin A																											[57]
toxin		Tryptoquialanins											[57]
	Toxin	Hepatotoxins																																	[53]
Volatile Organic Compounds	Volatile Organic Compounds	VOCs			[79]
	Macrophorin	4’-oxomacrophorin A, D
	Acetic acid	Acetic acid					[67]
	calphostins	Calphostins				[53]
	Chrysogine	Chrysogine													[57]										[57]		[57]				[57]
		Diaporthins																							[57]
		Dipodazin																							[57]
		Geomycin A, B, C						[64]
	Griseofulvin (antifungal agent)	Griseofulvin											[57]									[53]					[57]
		Hetero-spirocyclic γ-lactams		[10]
		Iridiskyrin																																	[53]
		Isopenilline A																															[65]
		Met Ø																												[57]
		Oidioperazine A, B, C, D								[62]
		Skyrin																																	[53]
		Xanthocillins													[57]											[57]		[57]

## Sheet: Foglio6
				P. chrysogenum var. dipodomyus (sub. P. dipodomyus)
acidic organic polymers	acidic organic polymers	Fulvic acid	Penicillium griseofulvum [53]
Aflavinine	Aflavinine	Dehydroaflavinine	Penicillium goetzii [57]
	Aflavinine	Dehydroaflavinine	P. kewense [57]
	Aflavinine	Dehydroaflavinine	P. sinaicum [57]
	Aflavinine	Pyrrolopyrazine alkaloids	Mortierella alpina [64]
alkaloid	alkaloid	Chrysogenamide	P. allii-sativi [57]
	alkaloid	Meleagrin	P. allii-sativi [57]
	alkaloid	Meleagrin	P. coprobium [53]
	alkaloid	Chanoclavine I	P. griseofulvum [53]
	alkaloids	Elymoclavine	P. griseofulvum [53]
	alkaloids	Chrysogenamide	P. rubens [57]
	alkaloids	Indolalkaloids	P. sinaicum [57]
	alkaloids	Dehydroaflavinine	P. cf. kewense [57]
	alkaloids	Neoxaline	Penicillium coprobium [53]
	alkaloids	Neoxaline	Penicillium sp. [65]
	alkanoids	Meleagrin	Penicillium sp. [65]
amino acid	amino acid	Cyclo-(L-Trp-L-Phe)	Aspergillus sydowii [63]
	amino acid	Tyrosine	Debaryomyces hansenii [67]
	amino acid	Valine	D. hansenii [67]
	amino acids	Alanine	D. hansenii [67]
	amino acids	Leucine	D. hansenii [67]
	amino acids	Alanine	Papiliotrema laurentii (sub. Cryptococcus laurentii) [67]
	amino acids	Tyrosine	Rhodotorula glutinis [67]
antibiotic	tetracycline-like antibiotic	Penicillins	Penicillium allii-sativi [10, 57]
	antibiotic	Viridicatumtoxin	P. aurantiogriseum ( sub. P. lanosocoeruleum) [57]
		Penicillins	P. chrysogenum [57]
		Penicillins	P. flavigenum [57]
		Mycelianamide	P. griseofulvum [53]
		Penicillic acid	P. nilense (sub. P. egyptiacum) [57]
		Penicillins	P. rubens [57]
		Penicillins	P. tardochrysogenum [57]
			P. vanluykii [57]
			Penicillium sp. [65]
aromatic compoud	anthraquinones	4-dihydroxy-3,5,6-trimethylbenzaldehyde	Aspergillus sydowii [10]
	bis‐anthraquinone	4-hydroxyphenylacetic acid	A. sydowii [63]
	tetrahydroxanthones	Formic acid	Debaryomyces hansenii [67]
	tetrahydroxanthones	Ethyl asterrate	Geomyces sp. [64]
	tetrahydroxanthones	2-pyruvoylaminobenzamide	Penicillium allii-sativi [57]
	tetrahydroxanthones	a naphtho-γ-pyrone	P. allii-sativi [57]
	aromatic hydrocarbon	Secalonic acids	P. chrysogenum [57]
	naphtho-α-pyrone	2-pyruvoylaminobenzamide	P. chrysogenum [57]
	aromatic compounds	Styrene	P. coprobium [53]
	aromatic compounds	Cyclopiamin	P. coprobium [53]
	anthraquinone	Secalonic acids	P. glandicola (sub. P. confertum and P. mononematosum)[57]
	anthraquinone	Viriditoxin	P. glandicola (sub. P. confertum and P. mononematosum)[57]
	aromatic compounds	Cyclopaldic acid & derived chromanols	P. glandicola (sub. P. confertum and P. mononematosum)[57]
	anthraquinone	Nalgiovensin	P. nalgiovense [57]
	anthraquinone	2-pyruvoylaminobenzamide	P. nalgiovense [57]
	aromatic compounds	Secalonic acids	P. nilense (sub. P. egyptiacum) [57]
	anthraquinones	2-pyruvoylaminobenzamide	P. persicinum [57]
	benzoxazoles	Chloctanspirone A	P. rubens [10]
	benzamides	2-pyruvoylaminobenzamide	P. rubens [57]
	benzamides	Secalonic acids	P. tardochrysogenum [57]
	benzamides	N-(2-hydroxyphenyl)-acetamide	Penicillium sp. [65]
	benzamides	2-benzoxazolinone	Penicillium sp. [65]
	benzamides	Formic acid	Rhodotorula glutinis [67]
	benzaldehyde	Roseoskyrin	Talaromyces islandicus (sub. Penicillium islandicum) [53]
	phenylacetic acid	Rubroskyrin	T. islandicus (sub. Penicillium islandicum) [53]
	naphtho-γ-pyrone	Emodin	T. islandicus (sub. Penicillium islandicum) [53]
	anthraquinone	Endocrocin	T. islandicus (sub. Penicillium islandicum) [53]
	carboxylic acids	Flavoskyrin	T. islandicus (sub. Penicillium islandicum) [53]
	carboxylic acids	Islandicin	T. islandicus (sub. Penicillium islandicum) [53]
	chlorinated polyketides	Chrysophanol	T. islandicus (sub. Penicillium islandicum) [53]
cladosporin	cladosporin	Isocladosporin	Cladosporium cladosporioides [53]
cyclic carboxylic esters	lactone	Citreoisocoumarin	Penicillium chrysogenum [57]
	lactone	Citreoisocoumarin	P. glandicola (sub. P. confertum and P. mononematosum)[57]
	lactone	Citreoisocoumarin	P. goetzii [57]
	lactone	Citreoisocoumarin	P. nalgiovense [57]
	lactone	Tetronic acids	P. nilense (sub. P. egyptiacum) [57]
	lactone	Citreoisocoumarin	P. rubens [57]
	γ-lactone	Asperentins	P. tardochrysogenum [57]
cyclic ketone	cyclic ketone	Isoepoxydon	Penicillum aurantiogriseum ( sub. P. lanosocoeruleum) [57]
	cyclic ketone	Isoepoxydon	P. sinaicum [57]
	cyclic ketone	Isoepoxydon	[57]
	cyclic ketone	Isoepoxydon	P. goetzii [57]
	cyclic ketone	Isoepoxydon	P. kewense [57]
cyclic polypeptide	cyclic polypeptide	Simatoxin	Talaromyces islandicus (sub. Penicillium islandicum) [53]
Exopolysaccharides	Exopolysaccharides	Exopolysaccharides	Debaryomyces hansenii [67]
	Exopolysaccharides	Exopolysaccharides	Papiliotrema laurentii (sub. Cryptococcus laurentii) [14]
	Exopolysaccharides	Exopolysaccharides	Rhodotorula glutinis [67]
furofurans	asteltoxin	Asteltoxin, Asteltoxin B	Aspergillus ochraceopetaliformis [24]
	furofurans	Isoasteltoxin	A. ochraceopetaliformis [56]
	furofurans	Asteltoxin, Asteltoxin B	Penicillium glandicola (sub. P. confertum and P. mononematosum)[57]
heterocyclic compound	2-benzofurans	Hydrogenated xanthon	Aspergillus sydowii [10]
	diketopiperazine	Acremolin C	A. sydowii [63]
	heteropentacyclic compound	Chetracin B, C, D	Oidiodendron truncatum [62]
	diketopiperazines	Oidioperazine A, B, C, D	O. truncatum [62]
	heteropentacyclic compound	Mycophenolic acid (MPA)	Penicillium brevicompactum [10]
	heteropentacyclic compound	Roquefortines	P. chrysogenum [57]
	xanthon	Roquefortines	P. coprobium [53]
	heterocyclic compound	Roquefortines	P. flavigenum [57]
	indolyl diketopiperazine	Fumitremorgin A, B, C, TR-2 & verruculogen	P. glandicola (sub. P. confertum and P. mononematosum)[57]
	piperazine	Roquefortines	P. glandicola (sub. P. confertum and P. mononematosum)[57]
	2,5-diketopiperazines	Fumitremorgin A, B, C, TR-2 & verruculogen	P. goetzii [57]
	2,5-diketopiperazines	Roquefortines	P. griseofulvum [53]
	2,5-diketopiperazines	Roquefortines	P. halotolerans [57]
	2,5-diketopiperazines	Fumitremorgin A, B, C, TR-2 & verruculogen	P. kewense [57]
	2,5-diketopiperazines	Roquefortines	P. kewense [57]
	2,5-diketopiperazines	Roquefortines	P. persicinum [57]
	2,5-diketopiperazines	Roquefortines	P. rubens [57]
	2,5-diketopiperazines	Roquefortines	P. vanluykii [57]
	2,5-diketopiperazines	Roquefortines	Penicillium allii-sativi [57]
	2,5-diketopiperazines	Penilloid A	Penicillium sp. [65]
	2,5-diketopiperazines	Questiomycin A	Penicillium sp. [65]
	Acremolin	(E)-3-(1H-imidazole-4-yimethylene)-6-(1H-indl-3-ylmethyl)-2,5-piperazinediol	Penicillium sp. [65]
indole terpenoid	indole-diterpenoid	Penitrem A	Penicillium flavigenum [57]
merosesquiterpenoids	merosesquiterpenoids	Ochraceopones A−E	Aspergillus ochraceopetaliformis [56]
meroterpenoid	meroterpenoid	Andrastins	P. chrysogenum [57]
	meroterpenoid	Andrastins	P. glandicola (sub. P. confertum and P. mononematosum)[57]
	meroterpenoid	Andrastins	P. goetzii [57]
	meroterpenoid	Andrastins	P. halotolerans [57]
	meroterpenoid	Andrastins	P. kewense [57]
	meroterpenoid	7-deacetoxyyanuthone	P. persicinum [57]
	meroterpenoid	Andrastins	P. rubens [57]
	meroterpenoid		P. rubens [57]
	meroterpenoid	Andrastins	P. vanluykii [57]
		Andrastins	P. cf. kewense [57]
	meroterpenoid	Atlantinone A	Penicillium allii-sativi [57]
mycotoxin	Isochromantoxins	Isochromantoxins	P. glandicola (sub. P. confertum and P. mononematosum)[57]
nitrogenous bases	nitrogenous bases	Adenine	Debaryomyces hansenii [67]
	nitrogenous bases	Adenine	Rhodotorula glutinis [67]
oxime-containing	Acetaldoxime	2-(4-hydroxyphenyl)-2-oxo acetaldehyde oxim	Penicillium allii-sativi [57]
	Acetaldoxime	2-(4-hydroxyphenyl)-2-oxo acetaldehyde oxim	P. desertorum [57]
phenols	phenols	Raistrick phenols	Penicillium desertorum [57]
	phenols	Raistrick phenols	P. halotolerans [57]
	phenols	Raistrick phenols	P. nilense (sub. P. egyptiacum) [57]
Polyene	Alkene	1-undecene	Penicillium coprobium [53]
	Polyene	Amphotericin B	P. nalgiovense [54]
polyketide	polyketide	Verrucosidin	Penicillium allii-sativi [57]
	pyrone-type polyketide	Sorbicillins	P. chrysogenum [57]
	Polyketide compounds	Patulin	P. coprobium [53]
	Polyketide compounds	Sorbicillins	P. flavigenum [57]
	Polyketide compounds	Sorbicillins	P. rubens [57]
sesquiterpenoid	sesquiterpenoid	(7S)-(+)-hydroxysydonic acid	Aspergillus sydowii [63]
	sesquiterpenoids	(7S, 11S)-(+)-12-hydroxysydonic acid	Aspergillus sydowii [63]
	sesquiterpenoids	Pyripyropens	Penicillium coprobium [53]
spirocyclic	spirocyclic	Pseurotin A	P. sinaicum [57]
toxin		Tryptoquialanins	Penicillium aurantiogriseum ( sub. P. lanosocoeruleum) [57]
	Toxin	Hepatotoxins	Talaromyces islandicus (sub. Penicillium islandicum) [53]
Volatile Organic Compounds	Volatile Organic Compounds	VOCs	Candida sake [79]
	Acetic acid	Acetic acid	Debaryomyces hansenii [67]
	calphostins	Calphostins	Cladosporium cladosporioides [53]
Chrysogine	Chrysogine	Chrysogine	Penicillium chrysogenum [57]
		Chrysogine	P. nalgiovense [57]
	Chrysogine	Chrysogine	P. persicinum [57]
	Chrysogine	Chrysogine	P. vanluykii [57]
		Diaporthins	P. nalgiovense [57]
		Dipodazin	P. nalgiovense [57]
		Geomycin A, B, C	Geomyces sp. [64]
Griseofulvin	Griseofulvin (antifungal agent)	Griseofulvin	P. aurantiogriseum ( sub. P. lanosocoeruleum) [57]
	Griseofulvin (antifungal agent)	Griseofulvin	P. griseofulvum [53]
	Griseofulvin (antifungal agent)	Griseofulvin	P. persicinum [57]
		Hetero-spirocyclic γ-lactams	Aspergillus sydowii [10]
		Iridiskyrin	Talaromyces islandicus (sub. Penicillium islandicum) [53]
		Isopenilline A	Penicillium sp. [65]
		Met Ø	P. tardochrysogenum [57]
		Oidioperazine A, B, C, D	Oidiodendron truncatum [62]
		Skyrin	Talaromyces islandicus (sub. Penicillium islandicum) [53]
Xanthocillins		Xanthocillins	Penicillium chrysogenum [57]
		Xanthocillins	P. nilense (sub. P. egyptiacum) [57]
		Xanthocillins	P. rubens [57]

## Sheet: Bioactive compounds
Biological activity	Chemical Category	Bioactive Secondary metabolite	Fungal taxa and reference	Isolation site	testing temperature	active against the target organism/cell line	Notes
Cytotoxic/antitumoral	Alkaloid	Neoxaline	Penicillium sp. [68]	King George Island	37 °C	K562, MCF-7, A549, U937, Hela, DU145, HL60, and HT29 cell lines	strain SCSIO 05705; strain growth temperature: 24 °C
		Meleagrin
		Questiomycin A
		chetracin	Oidiodendron truncatum [64]			P388 lymphocytic leukemic cell line	psychrophilic strain that can be cultured only under 20 °C; strain growth temperature: 15 °C
		Chetracin B, C (new epipolythiodioxopiperazines)				HCT-8 (human colon cancer cell line), BEL-7402 (human hepatocellular carcinoma cell line), BGC-823 (human gastric carcinoma cell line), A-549 (human lung cancer cell line), and A-2780 (human ovarian carcinoma cell line)
		Chetracin D (new diketopiperazine)
		Melinacidin IV (epipolythiodioxopiperazine)
		T988 A					strain growth temperature: 15 °C; psychrophilic strain that can be cultured only under 20 °C
		T988 C
	Dimeric tetrahydroxanthones (phenolic derivative)	Secalonic acid	Cladosporium sphaerospermum [64]			P388 lymphocytic leukemic cell line	strain growth temperature: 15 °C
		not analyzed	Aspergillus aculeatus [64]			P388 lymphocytic leukemic cell line
			A. flavus [64]
			A. terreus [64]
			Microdochium phragmitis [61]			human cancer cell lines MCF-7 (breast)	strain isolation temperature: 15 ± 2 °C
			Microdochium sp. [61]
			Mortierella antarctica [64]			P388 lymphocytic leukemic cell line	strain growth temperature: 15 °C
			Mortierella sp. [64]
			Mycosphaerella tassiana (sub. Davidiella tassiana) [61]			human cancer cell lines MCF-7 (breast)	strain isolation temperature: 15 ± 2 °C
			Penicillium chrysogenum [64]			P388 lymphocytic leukemic cell line	strain growth temperature: 15 °C
			P. citrinum [64]
			P. solitum (sub. P. crustosu) [64]
			Pseudogymnoascus sp. [64]
			Rhizoscyphus sp. [64]
			Aspergillus sydowii [11]	Ellsworth Mountains		cancer cell lines MCF-7 (breast)	strain isolation temperature: 5, 10 and 15 ± 2 °C
			Penicillium allii-sativi [11]
			P. brevicompactum [11]
Antibacterial	Alkaloid	Acremolin C (8-isopropyl-1, 5-dimethyl-1H-imidazo[2,1-b]purin-4(5H)-one)	Aspergillus sydowii [66]	King George Island	37 °C	methicillin-resistant Staphylococcus epidermidis (MRSE) and methicillin-resistant Staphylococcus aureus (MRSA), S. epidermidis (ATCC 040188), S. aureus (ATCC 25923)	strain growth temperature: room temperature
		Cyclo-(L-Trp-L-Phe), cyclic dipeptide (new compound)
		Questiomycin A	Penicillium sp. [68]			Mycobacterium tuberculosis	strain SCSIO 05705; strain growth temperature: 24 °C
	Phenolic derivative	Geomycin C (new asterric acid derivative)	Geomyces sp. [67]			Staphylococcus aureus (ATCC 6538), Streptococcus pneumoniae (CGMCC 1.1692), Escherichia coli (CGMCC 1.2340)	strain growth temperature: 25 °C
	Sesquiterpenoid and phenolic acid	(7S)-(+)-hydroxysydonic acid	Aspergillus sydowii [66]			methicillin-resistant Staphylococcus epidermidis (MRSE) and methicillin-resistant Staphylococcus aureus (MRSA), S. epidermidis (ATCC 040188), S. aureus (ATCC 25923)	strain growth temperature: room temperature
		(7S, 11S)-(+)-12-hydroxysydonic acid
		not analyzed	Anamorphic fungi [58]	Deception Island	37 °C	Pseudomonas aeruginosa (ATCC 27853), Escherichia coli (ATCC 25922)	psychrophilic strain (DCP-sp. 14)
			Aspergillus fumigatus [58]			Bacillus subtilis (ATCC 6051)	mesophilic strain
			Kabatiella zeae [58]			Escherichia coli (ATCC 25922), Bacillus subtilis (ATCC 6051), Staphylococcus aureus, Pseudomonas aeruginosa (ATCC 27853)
			Mucorsp. [58]			Staphylococcus aureus	psychrotolerant strain (DCP-sp. 4)
			Penicillium chrysogenum [58]			Staphylococcus aureus, Bacillus subtilis (ATCC 6051)	psychrophilic strain
			Antarctomyces psychrotrophicus [58]	Yenkee Bay		Escherichia coli (ATCC 25922)
			Geomyces sp. [58]			Escherichia coli (ATCC 25922), Bacillus subtilis (ATCC 6051), Staphylococcus aureus	psychrotrophic strain (YKB-sp. 4)
			Aspergillus sydowii [11]	Ellsworth Mountains		Staphylococcus aureus (ATCC 12600)	strain isolation temperature: 5, 10 and 15 ± 2 °C
			Penicillium allii-sativi [11]
			Penicillium b. [11]
			P chrysogenum [11]
			Oidiodendron truncatum [64]	King George Island		Mycobacterium phlei; Staphylococcus aureus	strain growth temperature: 15 °C; psychrophilic strain that can be cultured only under 20 °C
			Aspergillus terreus [64]			Escherichia coli; Proteus mirabilis; Mycobacterium phlei	strain growth temperature: 15 °C
			Cladosporium sphaerospermum [64]			Staphylococcus aureus
			Penicillium oxalicum[64]			Escherichia coli; Mycobacterium phlei; Proteus mirabilis; Staphylococcus aureus
			P. solitum (sub. P. crustosum) [64]			Escherichia coli; Mycobacterium phlei; Proteus mirabilis; Staphylococcus aureus
			Pseudogymnoascus sp. [64]			Escherichia coli; Mycobacterium phlei; Proteus mirabilis
			Purpureocillium lilacinum [62]			Staphylococcus aureus
			Pyricularia sp. [64]			Escherichia coli
Antifungal	Acyclic monoterpenoid	3,7-Dimethyl-6-octen-1-ol (citronellol) one of the main costituent of the VOCs	Candida sake [82]	King George Island	0 °C; 25 °C	postharvest pathogens of apple during cold storage: Penicillium expansum, Botrytis cinerea, Alternaria alternata, A. tenuissima, and A. arborescens	strain growth temperature: 25 °C
	Aromatic compound and alcohol	phenylethyl alcohol, one of the main costituent of the VOCs
	Fatty acid ester	3-methylbutyl hexanoate, the main constituent of VOCs
	Phenolic derivative	Geomycin B (new asterric acid derivative)	Geomyces sp. [67]		28 °C	Aspergillus fumigatus (ATCC 10894)
	Polyene macrolide	Amphotericin B	Penicillium nalgiovense [57]	Paulete Island	37 °C	Candida albicans (ATCC 90028)
		not analyzed	Aspergillus sydowii [11]	Ellsworth Mountains	25 °C	Cladosporium sphaerospermum (CCT 1740)	strain isolation temperature: 5°, 10° and 15 ± 2 °C
			Penicillium allii-sativi [11]
			P. brevicompactum [11]
			P. chrysogenum [11]			Colletotrichum gloesporioides, Colletotrichum fragariae, Cladosporium sphaerospermum (CCT 1740)
			P. rubens [11]			Cladosporium sphaerospermum (CCT 1740)
			Aspergillus flavus [64]	King George Island	37 °C	Candida albicans	strain growth temperature: 15 °C
			A. terreus [64]
			Beauveria bassiana [62]			Paracoccidioides brasiliensis
			Fusarium avenaceum (sub. Gibberella avenacea) [62]			Paracoccidioides brasiliensis
			Leucosporidium scottii [81]		1 °C; 25 °C	Penicillium expansum and Botritys cinerea	isolation and strain growth temperature: 9 ± 1 °C
			Oidiodendron truncatum [64]		37 °C	Candida albicans	strain growth temperature: 15 °C; psychrophilic strain that can be cultured only under 20 °C
			Penicillium chrysogenum [64]				strain growth temperature: 15 °C
			P. citrinum[64]
			P. oxalicum [64]
			P. solitum (sub. P. crustosum) [64]
			Penicillium sp. [62]			Paracoccidioides brasiliensis	isolation and growth temperature: 15°C
			Peniophora sp. [62]
			Pestalotiopsis microspora [62]
			Phanerochaete sp. [62]
			Pseudeurotium sp. [62]
			Pseudogymnoascus sp. [62]
			Purpureocillium lilacinum [62]
			Schizophyllum commune [62]
			Simplicillium lamellicola [62]
			Trichoderma longibrachiatum [62]
			Trichosporon asteroides [62]
Antiprotozoal		not analyzed	Penicillium brevicompactum [11]	Ellsworth Mountains	32 °C	Trypanosoma cruzi	strain isolation temperature: 5, 10 and 15 ± 2 °C
			Alternaria sp. [61]	King George Island		Leishmania amazonensis (strain IFLA/BR/196/PH-8)	strain isolation temperature: 15 ± 2 °C
			Antarctomyces psychrotrophicus [61]
			Cadophora luteo-olivacea [61]
			Helgardia sp. [61]
			Herpotrichia sp. [61]
			Oculimacula sp. [61]
			Phaeosphaeria herpotrichoides [61]
			Phaeosphaeria sp. [61]
			Purpureocillium lilacinum [62]			Trypanosoma cruzi	isolation temperature: 15 °C
			Mortierella amoeboidea [78]	South Shetland archipelago		Leishmania amazonensis (strain IFLA/BR/196/PH-8)	strain isolation temperature: 10 °C
			M. parvispora [78]			Trypanosoma cruzi, Leishmania amazonensis (strain IFLA/BR/196/PH-8)
			Penicillium chrysogenum [78]			Leishmania amazonensis (strain IFLA/BR/196/PH-8)
			Pseudogymnoascus destructans [78]
Antiviral	Furofurantriene α-pyrone	asteltoxin	Aspergillus ochraceopetaliformis [59]	King George Island	37 °C	H1N1 and H3N2 influenza viruses	strain SCSIO 05702; strain growth temperature: 24 °C
		isoasteltoxin
	α-Pyrone merosesquiterpenoid	ochraceopone A
		not analyzed	Penicillium allii-sativi [11]	Ellsworth Mountains		Dengue virus 2	strain isolation temperature: 5, 10 and 15 ± 2 °C
			P. brevicompactum [11]
			P. chrysogenum [11]
Herbicidal		not analyzed	Penicillium chrysogenum [11]		26 °C	Lactuca sativa (lettuce) and Agrostis stolonifera (bentgrass)	strain isolation temperature: 5, 10 and 15 ± 2 °C
			Mortierella amoeboidea [78]	South Shetland archipelago			strain isolation temperature: 10 °C
			Mortierella sp. [78]
			Penicillium tardochrysogenum [78]
			Pseudogymnoascus destructans [78]			Agrostis stolonifera (bentgrass)
Checked activity not significant	Alkaloid	chetoseminudin C	Oidiodendron truncatum [63]	King George Island			strain growth temperature: 15 °C; psychrophilic strain that can be cultured only under 20 °C
		(E)-3-(1H-imidazole-4-yimethylene)-6-(1H-indl-3-ylmethyl)-2,5-piperazinediol	Penicillium sp. [68]				strain SCSIO 05705; strain growth temperature: 24 °C
		Isopenilline A (new indolyl diketopiperazine derivative)	Penicillium sp. [68]
		Oidioperazine A, B, C, D (new diketopiperazines)	Oidiodendron truncatum [63]				strain growth temperature: 15 °C; psychrophilic strain that can be cultured only under 20 °C
		Penilline A (new indolyl diketopiperazine derivative)	Penicillium sp. [68]				strain SCSIO 05705; strain growth temperature: 24 °C
		Penilline B (new indolyl diketopiperazine derivative )
		penilloid A (new compound)
		cyclo-L-Trp-Lser (cyclic dipeptid)	Oidiodendron truncatum [63]				strain growth temperature: 15 °C; psychrophilic strain that can be cultured only under 20 °C
		T988 B
	Carboxylic acid and phenol	4-hydroxyphenylacetic acid	Aspergillus sydowii [66]				strain growth temperature: room temperature
	Phenolic derivative and ester	Ethyl asterrate (new diphenyl ether)	Geomyces sp. [67]				strain growth temperature: 25 °C
	Phenolic derivative and ester	n-butyl asterrate (new diphenyl ether)
	Phenolic derivative	asterric acid
	Phenolic derivative and acid	methyl asterrate
	Phenolic derivative and acid	Geomycin A (new asterric acid derivative)
	Phenolic derivative (spiro compound)	bisdechlorogeodin
	Merosesquiterpenoid	ochraceopone B, C, D, E (new highly oxygenated α-pyrone merosesquiterpenoids)	Aspergillus ochraceopetaliformis [59]				strain SCSIO 05702; strain growth temperature: 24 °C
Activity not evaluated	γ-Amino acid	γ-Aminobutyric acid (GABA)	Debaryomyces hansenii [70]	Livingston Island			strain growth temperature: 22 °C
	Beta-lactam derivatives	penicillins	Penicillium tardochrysogenum [60]	McMurdo Dry Valley			strain growth temperature: 25 °C
	Carboxylic acid amide	N-(2-hydroxyphenyl)-acetamide	Penicillium sp. [68]	King George Island			strain SCSIO 05705; strain growth temperature: 24 °C
	Carboxylic acid	Acetic acid	Debaryomyces hansenii [70]	King George Island			strain growth temperature: 22 °C
		Formic acid
			Rhodotorula glutinis [70]
	Dimeric tetrahydroxanthones (phenolic derivative)	Secalonic acid D, F	Penicillium tardochrysogenum [60]	McMurdo Dry Valley			strain growth temperature: 25 °C
	Exopolysaccharides	Exopolysaccharides	Cryptococcus laurentii AL62 [90]	Livingston Island			strain growth temperature: 22 °C
			Debaryomyces hansenii [70]
			Rhodotorula glutinis [70]
	Heterocyclic compound	2-Benzoxazolinone	Penicillium sp. [68]	King George Island			strain SCSIO 05705; strain growth temperature: 24 °C
	Isocoumarins (phenolic derivatives)	asperentins	P. tardochrysogenum [60]	McMurdo Dry Valley			compounds not produced by other members of series Chrysogena.
	Primary alchool	Choline	Cryptococcus laurentii[70]	Livingston Island			strain growth temperature: 22 °C
			Debaryomyces hansenii [70]
			Leucosporidium scotii[70]
			Rhodotorula glutinis [70]
			Sporobolomyces salmonicolor [70]
		partially characterized ‘met Ø’	Penicillium tardochrysogenum [60]	McMurdo Dry Valley			strain growth temperature: 25 °C
